# Supplementary material
Source: MDPI journal article supplement (https://www.mdpi.com/2571-6255/5/5/168)
Supplement: s1 [file s1]

**Table S1.** Total abundance (+ standard deviation among traps) of the families recorded in the study area through the treatments and sampling periods (year 1 and 2). The trophic guild to which they belong is also indicated. Mc: Micophages; Zp: Zoophages; Pl: Phytphages; Pt: Polyphages; Ps: Parasites; Sp: Saprophagi.

| Orders and Families | Year 1      |              |                 |               | Year 2     |              |                 |               |
|---------------------|-------------|--------------|-----------------|---------------|------------|--------------|-----------------|---------------|
|                     | Unburned    | Low severity | Medium severity | High severity | Unburned   | Low severity | Medium severity | High severity |
| COLEOPTERA          |             |              |                 |               |            |              |                 |               |
| Cantaridae (Zp)     | 101 (2.39)  | 77 (5.43)    | 55 (4.76)       | 3 (0.16)      | 140 (6.91) | 808 (40.15)  | 271 (12.15)     | -             |
| Carabidae (Zp)      | 37 (1.72)   | 47 (3.06)    | 137 (11.45)     | 3 (11.45)     | 77 (3.90)  | 74 (2.70)    | 12 (0.68)       | 2 (0.15)      |
| Cerambycidae (Pt)   | -           | -            | -               | -             | 1 (0.13)   | 1 (0.11)     | -               | -             |
| Chrysomelidae (Pt)  | 34 (1.75)   | 25 (0.81)    | 8 (1.18)        | 6 (0.23)      | 136 (7.12) | 210 (7.08)   | 23 (0.94)       | 2 (0.15)      |
| Coccinelidae (Zp)   | -           | -            | -               | -             | 3 (0.40)   | 1 (0.11)     | -               | -             |
| Corylophidae (Mc)   | -           | -            | -               | 1 (0.10)      | 1 (0.13)   | -            | -               | -             |
| Curculionidae (Pt)  | -           | 15 (1.05)    | 7 (0.59)        | 20 (0.93)     | 2 (0.17)   | 4 (0.39)     | 2 (0.14)        | 4 (0.20)      |
| Elateridae (Zp)     | -           | -            | -               | 1 (0.10)      | -          | -            | 4 (0.17)        | 1 (0.10)      |
| Erotylidae (Mc)     | -           | -            | -               | -             | 2 (0.17)   | -            | -               | -             |
| Lampyridae (Zp)     | -           | -            | 1 (0.20)        | 1 (0.10)      | -          | -            | -               | -             |
| Lathridiidae (Mc)   | 8 (0.55)    | 70 (4.89)    | 44 (3.50)       | 115 (5.16)    | -          | 8 (0.64)     | 2 (0.21)        | 2 (0.15)      |
| Leiodidae (Mc)      | -           | 2 (0.19)     | 1 (0.20)        | -             | -          | -            | 1 (0.10)        | -             |
| Lucanidae (Sp)      | 2 (0.16)    | 4 (0.39)     | 6 (0.59)        | 1 (0.10)      | 1 (0.13)   | 2 (0.15)     | 5 (0.33)        | 2 (0.15)      |
| Meloidae (Pl)       | -           | -            | -               | 1 (0.10)      | -          | -            | -               | -             |
| Nitidulidae (Sp)    | 2 (0.16)    | 1 (0.11)     | 1 (0.20)        | -             | -          | -            | -               | -             |
| Oedemeridae (Sp)    | -           | -            | -               | -             | -          | -            | -               | 2 (0.15)      |
| Ptilidae (Mc)       | 10 (0.93)   | 25 (1.54)    | 56 (3.94)       | 31 (1.22)     | -          | 12 (1.18)    | 71 (7.36)       | -             |
| Scarabeidae (Pl)    | 4 (0.37)    | 21 (1.50)    | 10 (0.60)       | -             | 14 (0.75)  | 16 (0.68)    | 3 (0.22)        | -             |
| Scirtidae (Pl)      | -           | -            | -               | 1 (0.10)      | -          | -            | -               | -             |
| Staphylinidae (Zp)  | 254 (15.95) | 154 (6.80)   | 149 (5.12)      | 148 (2.22)    | 30 (1.60)  | 56 (3.83)    | 171 (15.45)     | 6 (0.46)      |
| Tenebrionidae (Sp)  | -           | -            | -               | 2 (0.21)      | -          | -            | -               | -             |
| DIPTERA             |             |              |                 |               |            |              |                 |               |
| Anisopodidae (Sp)   | -           | -            | -               | 1 (0.10)      | 1 (0.20)   | 6 (0.31)     | -               | -             |
| Anthomyzidae (Sp)   | 252 (18.79) | 288 (36.81)  | 63 (5.21)       | 77 (3.21)     | -          | -            | 1 (0.10)        | 6 (0.29)      |
| Asilidae (Sp)       | -           | 2 (0.19)     | -               | -             | -          | -            | -               | -             |
| Bibionidae (Sp)     | 6 (0.48)    | 5 (0.39)     | 10 (0.88)       | 13 (0.56)     | 15 (0.97)  | 28 (1.64)    | 2 (0.14)        | -             |
| Calliphoridae (Sp)  | 2 (0.37)    | 11 (1.22)    | 2 (0.27)        | 4 (0.25)      | 2 (0.22)   | 2 (0.11)     | 1 (0.10)        | -             |

|                       |             |             |             |            |             |             |           |          |
|-----------------------|-------------|-------------|-------------|------------|-------------|-------------|-----------|----------|
| Carnidae (Sp)         | 2 (0.12)    | 21 (1.11)   | 4 (0.22)    | 3 (0.24)   | -           | -           | -         | -        |
| Cecidomyidae (Mc)     | 13 (0.98)   | 12 (0.59)   | 26 (3.07)   | 73 (1.94)  | 1 (0.20)    | 4 (0.20)    | 11 (0.56) | 2 (0.15) |
| Ceratopogonidae (Ps)  | -           | 7 (0.82)    | 15 (1.14)   | 19 (0.71)  | 2 (0.27)    | -           | 3 (0.22)  | -        |
| Clusiidae (Sp)        | 19 (1.49)   | 1 (0.11)    | 8 (0.68)    | -          | -           | 4 (0.23)    | 2 (0.21)  | -        |
| Dolichopodidae (Zp)   | 2 (0.16)    | -           | 5 (0.53)    | 3 (0.19)   | 2 (0.22)    | -           | 6 (0.43)  | 2 (0.19) |
| Drosophilidae (Sp)    | 2 (0.20)    | 8 (0.56)    | 5 (0.68)    | 8 (0.53)   | 2 (0.40)    | 2 (0.15)    | 2 (0.14)  | -        |
| Empididae (Zp)        | 10 (0.41)   | 4 (0.52)    | 3 (0.61)    | 8 (0.35)   | 28 (1.39)   | 40 (1.76)   | 9 (0.49)  | -        |
| Keroplastidae (Sp)    | -           | -           | -           | -          | 3 (0.40)    | 8 (0.61)    | 1 (0.10)  | -        |
| Lauzanidae (Sp)       | -           | 3 (0.24)    | 6 (0.45)    | 12 (0.46)  | -           | 4 (0.20)    | 2 (0.22)  | -        |
| Limoniidae (Sp)       | -           | -           | -           | 4 (0.36)   | 4 (0.77)    | 12 (0.80)   | 8 (0.82)  | 4 (0.41) |
| Lonchopteridae (Sp)   | -           | -           | -           | 1 (0.10)   | 1 (0.20)    | 1 (0.11)    | -         | -        |
| Milichidae (Ps)       | 2 (0.20)    | -           | 1 (0.20)    | 1 (0.10)   | -           | -           | -         | -        |
| Muscidae (Sp)         | 104 (2.45)  | 16 (1.04)   | 20 (1.50)   | 50 (2.22)  | 5 (0.60)    | 16 (0.54)   | 35 (2.50) | -        |
| Mycetophilidae (Mc)   | 56 (3.51)   | 117 (4.97)  | 95 (3.58)   | 116 (2.96) | 170 (11.67) | 146 (2.86)  | 83 (3.99) | 8 (0.46) |
| Psillydae (Pt)        | 2 (0.20)    | 1 (0.11)    | 2 (0.22)    | -          | -           | -           | -         | -        |
| Phoridae (Ps)         | 240 (17.70) | 245 (15.91) | 202 (13.58) | 173 (5.17) | 147 (7.30)  | 448 (24.23) | 25 (0.95) | -        |
| Platypezidae (Mc)     | -           | -           | -           | -          | 12 (0.77)   | -           | -         | -        |
| Rhangionidae (Zp)     | -           | 1 (0.11)    | 2 (0.25)    | -          | -           | -           | 2 (0.21)  | -        |
| Scathophagidae (Sp)   | -           | -           | -           | -          | 9 (0.70)    | 4 (0.20)    | 4 (0.42)  | -        |
| Scatopsidae (Sp)      | 10 (0.67)   | 5 (0.46)    | -           | 3 (0.31)   | -           | 4 (0.20)    | 6 (0.52)  | -        |
| Sciaridae (Sp)        | 22 (1.62)   | 14 (0.92)   | 22 (1.57)   | 88 (2.80)  | 16 (0.83)   | 8 (0.56)    | 15 (0.51) | 4 (0.19) |
| Sphaeroceridae (Sp)   | 8 (0.83)    | 43 (3.21)   | 19 (1.56)   | 29 (1.73)  | 25 (1.22)   | 128 (5.88)  | 9 (0.83)  | -        |
| Tachinidae (Ps)       | -           | -           | -           | -          | -           | -           | -         | 2 (0.15) |
| Tipulidae (Sp)        | -           | -           | -           | -          | 8 (0.96)    | 64 (2.01)   | 1 (0.10)  | 2 (0.19) |
| HEMIPTERA             |             |             |             |            |             |             |           |          |
| Aphidae (Pt)          | 2 (0.16)    | 2 (0.23)    | 4 (0.40)    | 3 (0.42)   | -           | -           | -         | -        |
| Cicadellidae (Pt)     | 4 (0.21)    | 19 (1.05)   | 19 (1.41)   | 81 (1.91)  | -           | 6 (0.39)    | 14 (0.54) | 4 (0.20) |
| Coreidae (Pt)         | -           | -           | -           | -          | 5 (1.02)    | -           | 1 (0.14)  | -        |
| Delphacidae (Pt)      | -           | 1 (0.11)    | 1 (0.22)    | 9 (0.38)   | -           | -           | -         | -        |
| Enicocephallidae (Pr) | 2 (0.16)    | -           | 1 (0.20)    | -          | 1 (0.20)    | -           | -         | 2 (0.15) |
| Lygaeidae (Pt)        | -           | 4 (0.37)    | 4 (0.38)    | 1 (0.10)   | 1 (0.20)    | 2 (0.15)    | -         | -        |
| Nabidae (Zp)          | 4 (0.37)    | -           | 1 (0.20)    | 6 (0.36)   | -           | -           | -         | -        |
| Pentatomidae (Pt)     | -           | -           | -           | -          | -           | -           | 1 (0.14)  | -        |
| HYMENOPTERA           |             |             |             |            |             |             |           |          |
| Bethylidae (Ps)       | 2 (0.20)    | -           | -           | -          | -           | -           | -         | -        |
| Braconidae (Ps)       | 52 (2.25)   | 3 (0.35)    | -           | 1 (0.10)   | 3 (0.40)    | -           | 3 (0.31)  | -        |

|                       |               |              |               |                 |             |             |             |             |
|-----------------------|---------------|--------------|---------------|-----------------|-------------|-------------|-------------|-------------|
| Cynipidae (Ps)        | -             | -            | -             | -               | -           | -           | 1 (0.14)    | -           |
| Driapriidae (Ps)      | 32 (2.25)     | 100 (4.86)   | 31 (1.72)     | 11 (0.44)       | 29 (0.93)   | 54 (1.94)   | 26 (1.18)   | -           |
| Encyrtidae (Ps)       | -             | -            | -             | -               | 2 (0.34)    | -           | (0.14)      | -           |
| Evaniidae (Ps)        | 1 (0.10)      | -            | -             | -               | -           | -           | -           | -           |
| Formicidae (Pl)       | 136 (7.55)    | 67 (3.47)    | 226 (17.98)   | 72 (2.76)       | 206 (16.33) | 34 (1.14)   | 241 (20.44) | 6 (0.37)    |
| Ichneumonidae (Ps)    | 2 (0.20)      | 1 (0.11)     | 3 (0.30)      | 1 (0.10)        | 1 (0.20)    | -           | 1 (0.10)    | -           |
| Megaspilidae (Ps)     | -             | -            | -             | 1 (0.10)        | -           | -           | -           | -           |
| Pompilidae (Ps)       | -             | -            | -             | 1 (0.10)        | -           | -           | -           | -           |
| Proctotrupidae (Ps)   | -             | 1 (0.11)     | -             | -               | -           | -           | -           | -           |
| Pteromalidae (Ps)     | -             | 3 (0.35)     | 2 (0.40)      | -               | -           | 6 (0.29)    | -           | -           |
| Scelionidae (Ps)      | -             | 1 (0.11)     | -             | -               | -           | 2 (0.15)    | -           | -           |
| Vespidae (Zp)         | 2 (0.16)      | -            | 1 (0.22)      | 4 (0.31)        | -           | -           | -           | -           |
| LEPIDOPTERA           |               |              |               |                 |             |             |             |             |
| Saturnidae (Pt)       | -             | -            | -             | -               | 1 (0.19)    | -           | -           | -           |
| Noctuidae (Pt)        | -             | -            | -             | 2 (0.21)        | -           | -           | -           | -           |
| Geometridae (Pt)      | -             | 1 (0.11)     | 2 (0.22)      | 1 (0.10)        | -           | -           | -           | -           |
| DERMAPTERA            |               |              |               |                 |             |             |             |             |
| Familia X (Pl)        | 6 (0.48)      | 2 (0.35)     | 4 (0.41)      | 3 (0.21)        | 60 (6.58)   | 8 (0.61)    | 5 (0.23)    | -           |
| ORTOPTERA             |               |              |               |                 |             |             |             |             |
| Acrididae (Pt)        | -             | -            | -             | 1 (0.10)        | -           | -           | 1 (0.10)    | 1 (0.11)    |
| Rhaphidophoridae (Pl) | 2 (0.20)      | 5 (0.36)     | 1 (0.13)      | -               | 10 (0.49)   | 8 (0.56)    | -           | -           |
|                       | -             | 3 (0.27)     | -             | -               | 8 (0.81)    | -           | -           | -           |
| Stenopelmatidae (Pl)  |               |              |               |                 |             |             |             |             |
| NEUROPTERA            | -             | -            | 1 (0.20)      | 1 (0.10)        | -           | -           | -           | -           |
| Hemerobiidae (Zp)     |               |              |               |                 |             |             |             |             |
| BLATTODEA             | 10 (0.57)     | 6 (0.58)     | 8 (0.88)      | 6 (0.42)        | -           | -           | -           | -           |
| Blattellidae (Sp)     |               |              |               |                 |             |             |             |             |
| SIPHONAPTERA          | 2 (0.12)      | 2 (0.23)     | -             | (0.21)          | -           | -           | -           | -           |
| Pulicidae (Sp)        |               |              |               |                 |             |             |             |             |
| PSOCOMORPHA           | 2 (0.12)      | 2 (0.23)     | -             | 2 (0.21)        | -           | -           | -           | -           |
| Pulicidae (Sp)        |               |              |               |                 |             |             |             |             |
| COLLEMBOLA            | 2634 (195.95) | 2540 (57.03) | 3149 (130.97) | 16512 (1029.55) | 309 (35.53) | 494 (15.40) | 638 (20.59) | 408 (29.42) |
| Arthropleona (Sp)     | -             | 11 (0.95)    | 14 (1.15)     | 21 (1.24)       | -           | -           | -           | -           |
| Syphyleona (Sp)       |               |              |               |                 |             |             |             |             |
| THYSANURA             | 38 (2.15)     | 6 (0.59)     | 10 (0.92)     | 7 (0.73)        | 1 (0.13)    | 58 (2.24)   | 9 (0.35)    | -           |
| Family X (Sp)         |               |              |               |                 |             |             |             |             |

|               |           |           |           |           |           |           |           |          |
|---------------|-----------|-----------|-----------|-----------|-----------|-----------|-----------|----------|
| ARANAE        | 36 (1.95) | 41 (1.90) | 43 (3.72) | 20 (0.85) | 29 (2.01) | 84 (5.64) | 13 (0.41) | 4 (0.30) |
| Family X (Zp) |           |           |           |           |           |           |           |          |
| OPILIONIDAE   | 10 (0.25) | 2 (0.23)  | 4 (0.44)  | -         | 25 (0.72) | 2 (0.36)  | 3 (0.22)  | -        |
| Family X (Sp) |           |           |           |           |           |           |           |          |
| ACARINA       | 24 (1.67) | 29 (1.61) | 17 (1.38) | 9 (0.49)  | 11 (0.52) | 26 (1.26) | 2 (0.22)  | -        |
| Family X (Sp) |           |           |           |           |           |           |           |          |
